# Supplementary material for: A lead-halide perovskite molecular ferroelectric semiconductor
Source: PubMed Central journal article supplement (PMC4458893; doi:10.1038/ncomms8338), 2015-05-29
Supplement: ncomms8338-s1.pdf [file ncomms8338-s1.pdf]

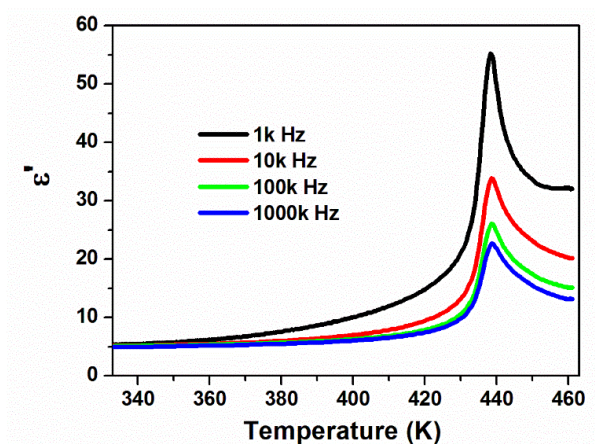

**Supplementary Figure 1.** Permittivity of (benzylammonium)<sub>2</sub>PbCl<sub>4</sub> (**1**) as function of temperature measured on a powder-pressed pellet, showing relatively larger dielectric anomalies.

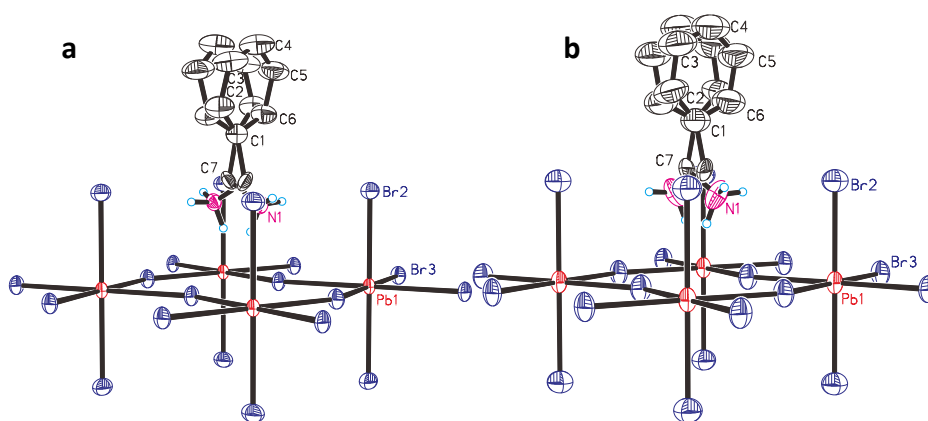

**Supplementary Figure 2.** Asymmetric units of (benzylammonium)<sub>2</sub>PbBr<sub>4</sub> (**2**) at various temperatures, showing the similarities. **(a)** Ellipsoid drawing of asymmetric unit of **2** at 298 K. **(b)** Ellipsoid drawing of asymmetric unit of **2** at 423 K. H-atoms bonded to C-atoms were omitted for clarity. The non-hydrogen atoms not labeled were generated by symmetry operation. Displacement ellipsoids were drawn at the 30% probability level

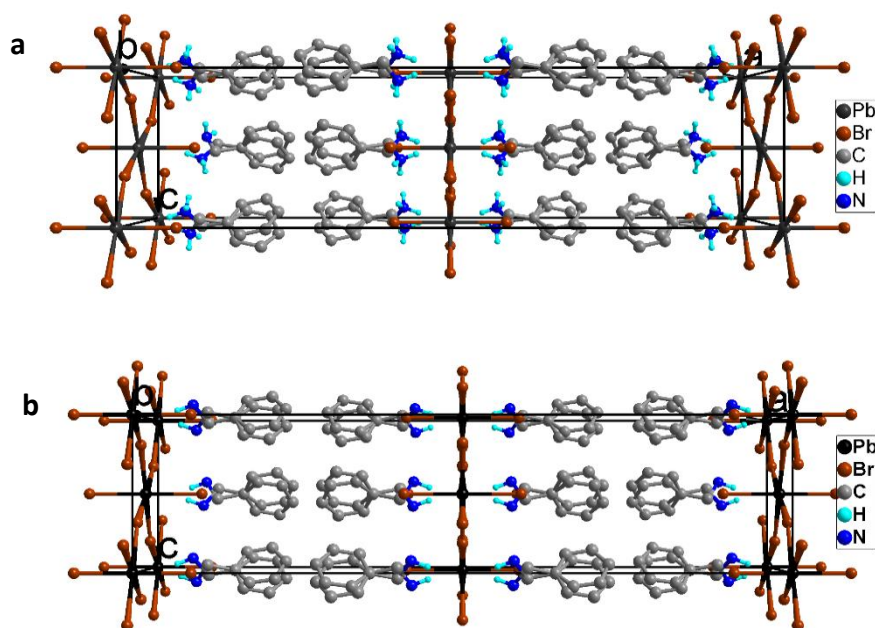

**Supplementary Figure 3.** Crystal structures of (benzylammonium)<sub>2</sub>PbBr<sub>4</sub> at various temperatures, showing the similarities. **(a)** A packing view of (benzylammonium)<sub>2</sub>PbBr<sub>4</sub> (**2**) at 293 K. **(b)** A packing view of **2** at 423 K. Hydrogen atoms bonded to the C atoms were omitted for clarity. For all structures, the systematic absence at 298, 323, 373 and 423 K are almost the same. The suggested spacegroups are *Cmca* and *Aba2*, and the more possible spacegroup is the *Cmca* because the mean value of  $|E^2-1|$  for each temperature structure is close to the theoretically expected value of 0.968 for a centrosymmetric structure. Since the cell constants of (benzylammonium)<sub>2</sub>PbBr<sub>4</sub> is similar to those of (benzylammonium)<sub>2</sub>PbCl<sub>4</sub>, one would expect the same space group for (benzylammonium)<sub>2</sub>PbBr<sub>4</sub> and (benzylammonium)<sub>2</sub>PbCl<sub>4</sub>. At this stage, we sorted to the SHG response. We performed SHG measurements in the temperature range 298-453 K. No double frequency signal was observed. Thus, we finally refined all these structure in the centrosymmetric spacegroup *Cmca*. As shown in supplementary Figs 2 and 3, the final models are almost the same.

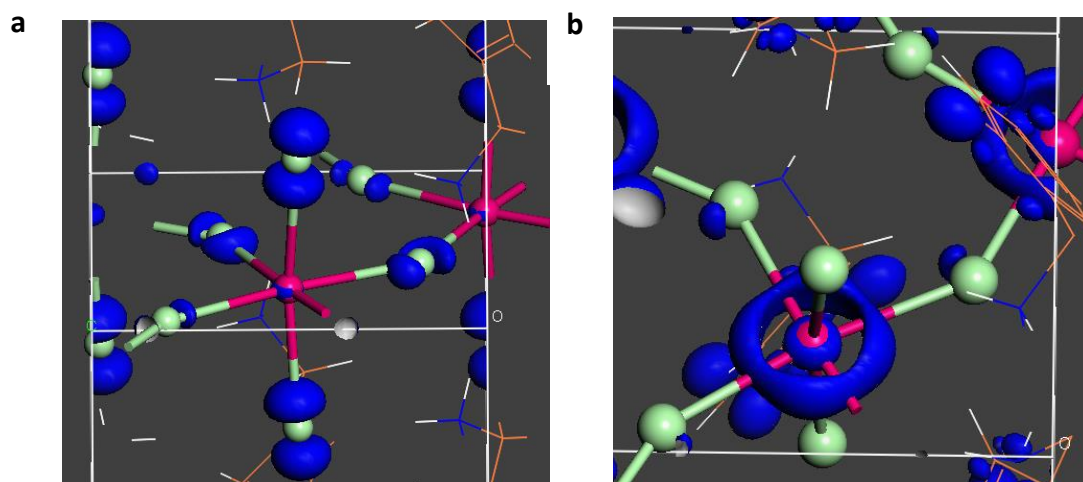

**Supplementary Figure 4.** Calculated molecular orbitals. **(a)** Calculated molecular orbital located at the valence band. **(b)** Calculated molecular orbital at the conduction band.

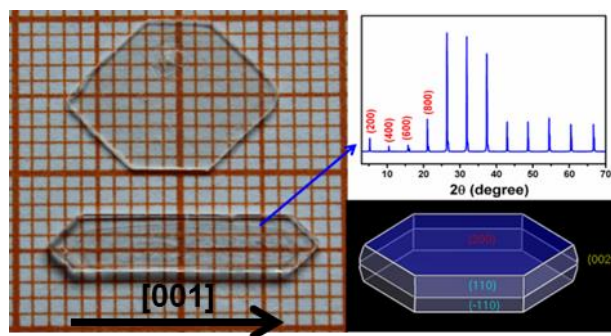

**Supplementary Figure 5.** An image of two large single crystals of (benzylammonium)<sub>2</sub>PbCl<sub>4</sub> (**1**), and the simulated morphology from Material Studio.

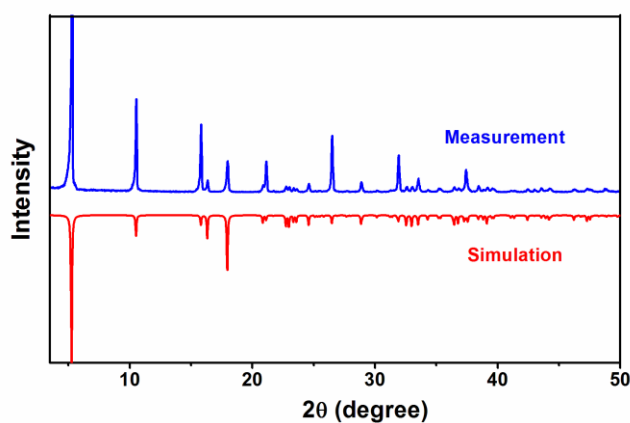

**Supplementary Figure 6.** Pattern of powder diffraction for (benzylammonium)<sub>2</sub>PbCl<sub>4</sub> (**1**), verifying the purity of the bulk phase.

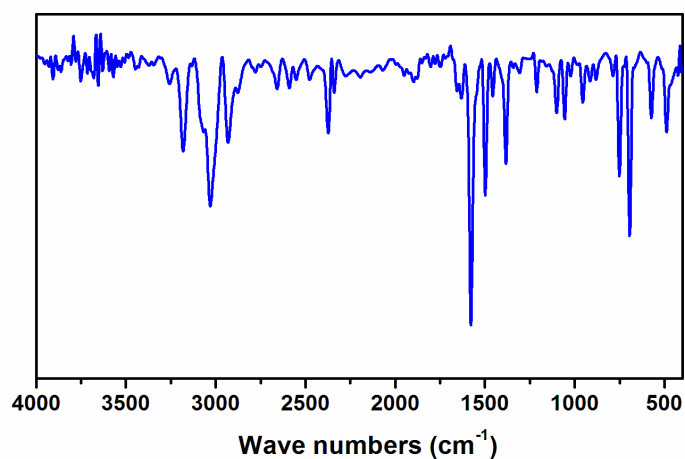

**Supplementary Figure 7.** The Infrared spectrum for (benzylammonium)<sub>2</sub>PbCl<sub>4</sub> (**1**).

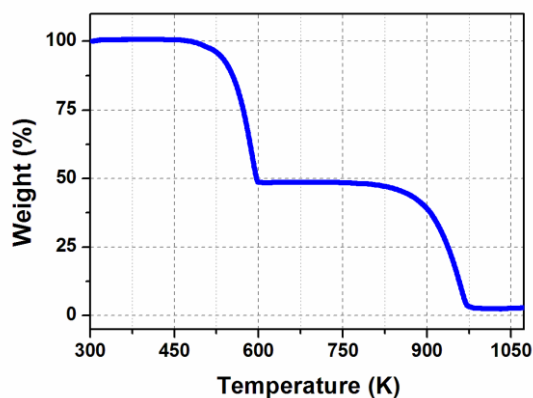

**Supplementary Figure 8.** Thermal analysis for (benzylammonium)<sub>2</sub>PbCl<sub>4</sub> (**1**), showing the stability up to about 480 K.

**Supplementary Table 1. Crystal data for (benzylammonium)<sub>2</sub>PbCl<sub>4</sub> (for all structures: Mr = 565.31, Z = 4).**

|                                      | 93 K                                                              | 173 K                                  | 293 K                                  | 323 K                                  | 373 K                                  | 423 K                                  | 453 K                        |
|--------------------------------------|-------------------------------------------------------------------|----------------------------------------|----------------------------------------|----------------------------------------|----------------------------------------|----------------------------------------|------------------------------|
| Chemical formula                     | (C <sub>7</sub> H <sub>10</sub> N) <sub>2</sub> PbCl <sub>4</sub> |                                        |                                        |                                        |                                        |                                        |                              |
| Crystal system, space group          | orthorhombic, <i>Cmc2</i> <sub>1</sub>                            | orthorhombic, <i>Cmc2</i> <sub>1</sub> | orthorhombic, <i>Cmc2</i> <sub>1</sub> | orthorhombic, <i>Cmc2</i> <sub>1</sub> | orthorhombic, <i>Cmc2</i> <sub>1</sub> | orthorhombic, <i>Cmc2</i> <sub>1</sub> | orthorhombic, <i>Cmca</i> ,  |
| a, b, c (Å)                          | 33.150(16)<br>7.773(3)<br>7.652(4)                                | 33.317(16)<br>7.785(3)<br>7.680(4)     | 33.64(2)<br>7.817(4)<br>7.737(4)       | 33.65(3)<br>7.806(8)<br>7.732(7)       | 33.91(4)<br>7.842(8)<br>7.776(9)       | 34.39(6)<br>7.920(14)<br>7.880(15)     | 34.62(13)<br>7.84(3) 7.94(3) |
| V (Å <sup>3</sup> )                  | 1971.5(16)                                                        | 1991.9(16)                             | 2034.3(19)                             | 2031(3)                                | 2067(4)                                | 2146 (7)                               | 2157(14)                     |
| D <sub>c</sub> (g cm <sup>-3</sup> ) | 1.905                                                             | 1.885                                  | 1.846                                  | 1.849                                  | 1.816                                  | 1.749                                  | 1.741                        |
| μ (mm <sup>-1</sup> )                | 9.095                                                             | 9.001                                  | 8.814                                  | 8.827                                  | 8.8673                                 | 8.8353                                 | 8.8314                       |
| R <sub>1</sub> (I > 2σ(I))           | 0.0394                                                            | 0.0375                                 | 0.0374                                 | 0.0453                                 | 0.0535                                 | 0.0588                                 | 0.0771                       |
| wR <sub>2</sub> (all data)           | 0.0674                                                            | 0.0688                                 | 0.0666                                 | 0.0954                                 | 0.1272                                 | 0.1546                                 | 0.1545                       |
| S                                    | 0.929                                                             | 0.921                                  | 0.889                                  | 0.955                                  | 0.944                                  | 0.956                                  | 1.201                        |

**Supplementary Table 2. Crystal data for (benzylammonium)<sub>2</sub>PbBr<sub>4</sub> (for all structures: Mr = 743.1, Z = 4)**

|                                      | 293 K                                                             | 323 K         | 373 K         | 423 K         |
|--------------------------------------|-------------------------------------------------------------------|---------------|---------------|---------------|
| Chemical formula                     | (C <sub>7</sub> H <sub>10</sub> N) <sub>2</sub> PbBr <sub>4</sub> |               |               |               |
| Crystal system,                      | orthorhombic,                                                     | orthorhombic, | orthorhombic, | orthorhombic, |
| space group                          | <i>Cmca</i>                                                       | <i>Cmca</i>   | <i>Cmca</i>   | <i>Cmca</i>   |
| a, b, c (Å)                          | 33.394(17)                                                        | 33.49(3)      | 33.78(5)      | 33.87(3)      |
|                                      | 8.153(4)                                                          | 8.169(6)      | 8.200(11)     | 8.183(7)      |
|                                      | 8.131(4)                                                          | 8.151(6)      | 8.198(12)     | 8.193(8)      |
| V (Å <sup>3</sup> )                  | 2214(2)                                                           | 2031(3)       | 2271(6)       | 2270(4)       |
| D <sub>c</sub> (g cm <sup>-3</sup> ) | 2.230                                                             | 2.213         | 2.174         | 2.174         |
| μ (mm <sup>-1</sup> )                | 14.836                                                            | 14.728        | 14.728        | 14.463        |
| R <sub>1</sub> (I > 2σ(I))           | 0.0465                                                            | 0.0445        | 0.0488        | 0.0487        |
| wR <sub>2</sub> (all data)           | 0.1017                                                            | 0.1027        | 0.1136        | 0.1176        |
| S                                    | 1.009                                                             | 0.982         | 1.083         | 0.891         |
